# Supplementary material
Source: PubMed Central journal article supplement (PMC4575868)
Supplement: NIHMS712485-supplement-1.pdf [file NIHMS712485-supplement-1.pdf]

Supplementary Figure 1. RNA expression within  $T_{FR}$  in uninfected and SIV infected RM.

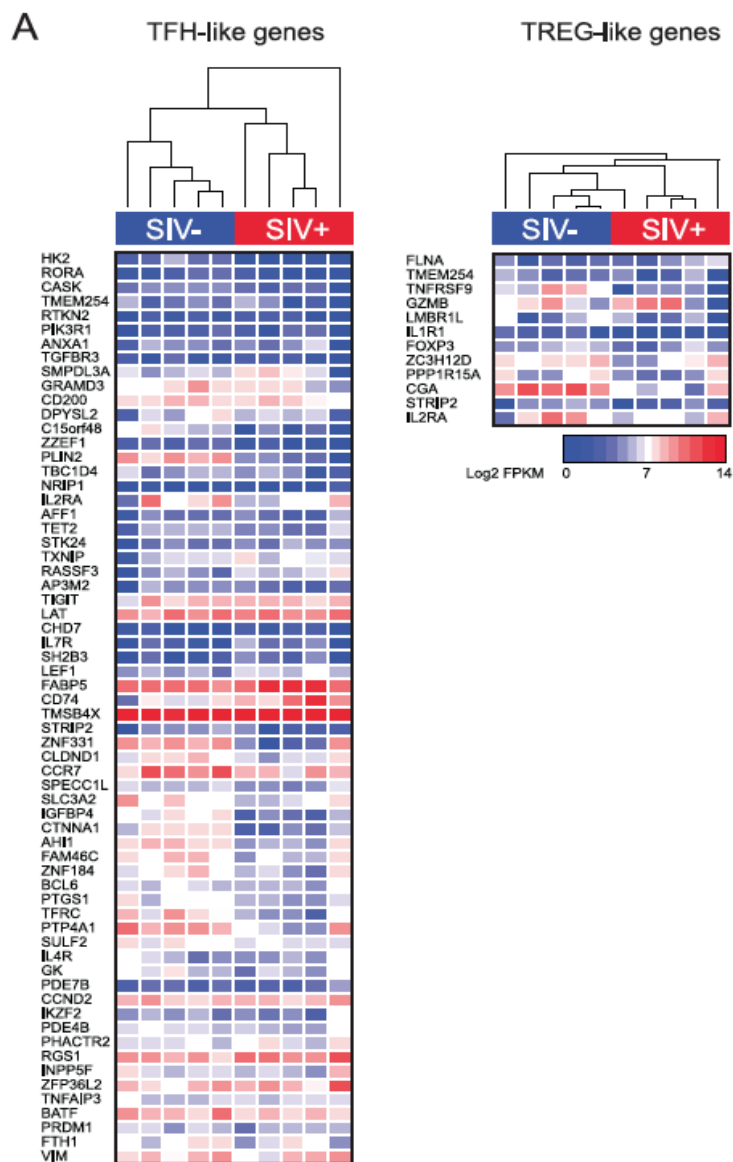

Supplementary Figure 1. **RNA expression within  $T_{FR}$  in uninfected and SIV infected RM.**  
 (A) Heat map of log 2 transformed gene expression of transcripts in FPKM between  $T_{FR}$  cells from SIV uninfected and infected RM.

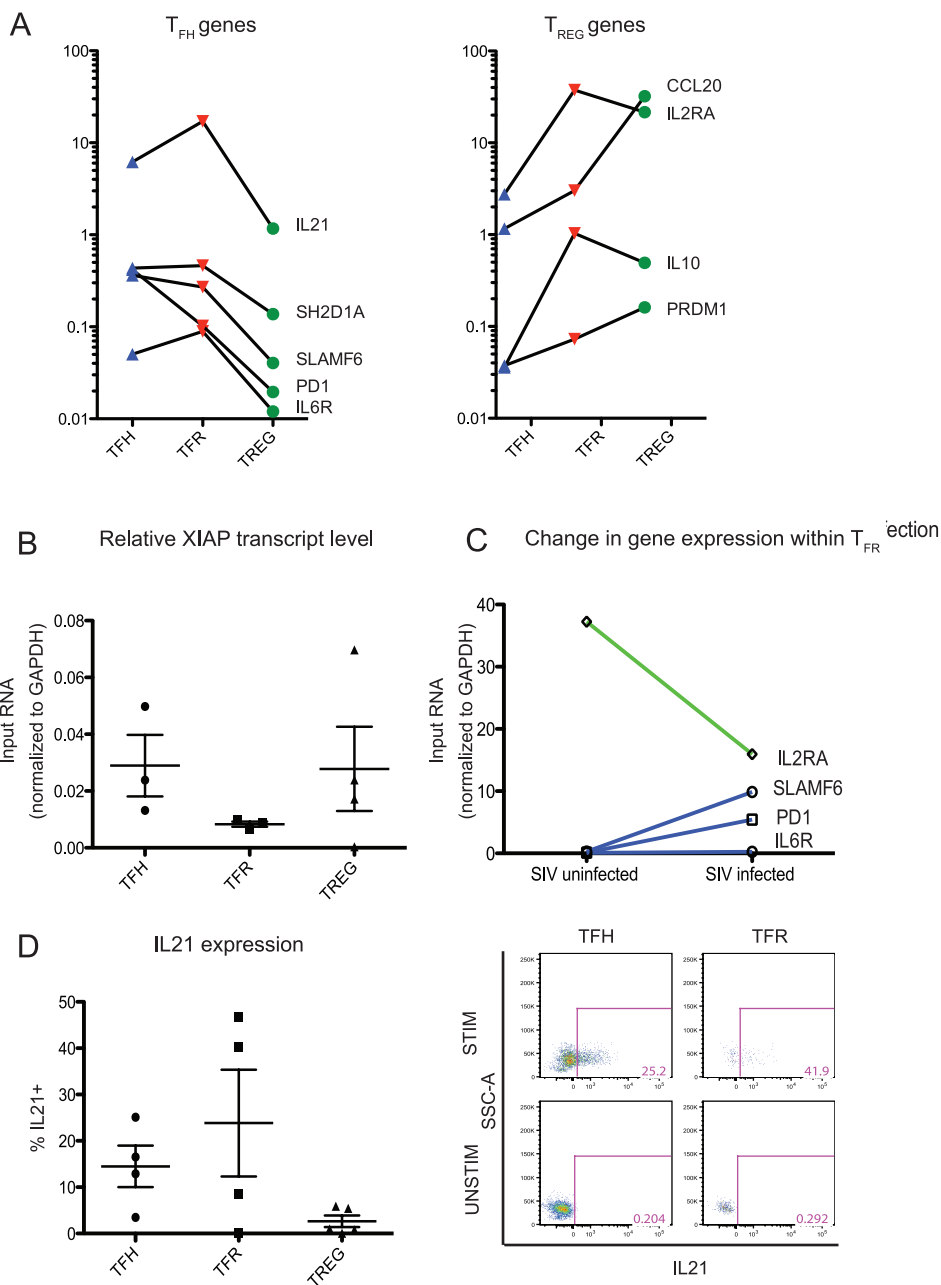

Supplementary Figure 2. PCR and flow cytometry validation of RNA-sequencing data.

Relative RNA transcript levels of key T<sub>FH</sub> and T<sub>REG</sub> genes (A) and XIAP (B) in T<sub>FH</sub>, T<sub>FR</sub> and T<sub>REG</sub> populations from five SIV uninfected RM measured by RT-PCR. (C) Change in expression of genes post SIV-infection in sorted T<sub>FR</sub> cells from 5 infected and 5 uninfected RM. All genes were normalized to the housekeeping gene, GAPDH. (D) Levels of IL21 expression as measured by flow cytometry following PMA/ionomycin stimulation in T<sub>FH</sub>, T<sub>FR</sub> and T<sub>REG</sub> populations and representative FACS plot derived from LN of SIV uninfected RM. For this analysis T<sub>FH</sub> cells were defined as CXCR5<sup>+</sup>PD1<sup>hi</sup>CD127<sup>+</sup>CD25<sup>+</sup> cells.

Supplementary Table 1. Quantification of T<sub>FH</sub> and T<sub>FR</sub> cells by immunohistochemistry.

| Animal | Timepoint         | Number of TFH | Number of TFR | TFR/TFH Ratio |
|--------|-------------------|---------------|---------------|---------------|
| RM1    | Uninfected        | 43            | 4             | 0.093         |
|        | Uninfected        | 72            | 6             | 0.083         |
| RM2    | Uninfected        | 57            | 6             | 0.105         |
|        | Uninfected        | 38            | 2             | 0.052         |
| RM3    | Acute Infection   | 67            | 6             | 0.089         |
|        | Acute Infection   | 47            | 5             | 0.106         |
| RM4    | Acute Infection   | 78            | 9             | 0.115         |
|        | Acute Infection   | 60            | 7             | 0.116         |
| RM5    | Chronic Infection | 139           | 4             | 0.028         |
|        | Chronic Infection | 95            | 4             | 0.042         |
| RM6    | Chronic Infection | 66            | 3             | 0.045         |
|        | Chronic Infection | 89            | 5             | 0.056         |

Supplementary Table 1. Quantification of T<sub>FH</sub> and T<sub>FR</sub> cells by immunohistochemistry.

Number of T<sub>FH</sub> and T<sub>FR</sub> cells counted per unit area within individual representative germinal centers of RM. T<sub>FH</sub> cells were identified as CD4<sup>+</sup>PD1<sup>+</sup> cell and T<sub>FR</sub> cells were identified as CD4<sup>+</sup>PD1<sup>+</sup>Foxp3<sup>+</sup> cells.
